# Supplementary material
Source: Research Square preprint supplement (doi:10.21203/rs.3.rs-8939070/v1)
Supplement: Supplementary file 1 [file 1d8a9b6e91a3389aaeed1ecb.docx]

**Table 1** Comparison of demographics, clinical features, and blood laboratory data between second IVIG and IFX groups

| **Demographics**  **and blood laboratory data** | **2nd line - second IVIG**  **(n=70)** | **2nd line - IFX**  **(n=54)** | **p value*** |
| --- | --- | --- | --- |
| Age; months | 33 (26-43) | 42 (26-59) | 0.03 |
| Male; n (%) | 38 (54) | 32 (59) | 0.71 |
| Days of initial treatment; day | 5 (4-5) | 5 (4-5) | 0.33 |
| Days of 2nd treatment; day | 7 (7-8) | 7 (6-8) | 0.45 |
|  |  |  |  |
| White blood cell count (WBC); ×103 /µL | 13.2 (10.6-15.0) | 15.1 (11.9-18.1) | 0.03 |
| Hemoglobin; g/dL | 11.6 (11.0-12.0) | 11.7 (11.1-12.3) | 0.35 |
| Platelet count; ×104 /µL | 28.1 (23.1-36.4) | 28.2 (24.6-35.5) | 0.82 |
| Aspartate aminotransferase (AST); U/L | 48 (29-106) | 49 (27-192) | 0.85 |
| Alanine aminotransferase (ALT); U/L | 93 (13-188) | 31 (16-210) | > 0.9 |
| Sodium; mmol/L | 132 (129-135) | 133 (131-135) | 0.29 |
| C-reactive protein (CRP); mg/L | 8.6 (5.5-12.2) | 10.2 (6.5-13.5) | 0.21 |
| Albumin; g/dL | 3.4 (3.1-3.7) | 3.7 (3.3-3.8) | 0.03 |
| Immunoglobulin G; mg/dL | 692 (600-849) | 668 (579-830) | 0.57 |
| Triglyceride; mg/dL | 95 (78-116) | 85 (68-104) | 0.14 |
| Total cholesterol; mg/dL | 139 (119-152) | 132 (120-158) | 0.82 |
| HDL cholesterol; mg/dL | 32 (25-39) | 34 (26-44) | 0.34 |
| LDL cholesterol; mg/dL | 84 (71-99) | 84 (67-106) | 0.89 |
|  |  |  |  |
| Max CA Z score ≥ 5.0 within 30 days; n (%) | 3 (4.3) | 3 (5.6) | > 0.90 |
| CAA after 30 days; n (%) | 2 (2.9) | 2 (3.7) | > 0.90 |
| CAA after 6 months; n (%) | 1 (1.4) | 1 (1.9) | > 0.90 |
| CAA after 1 year; n (%) | 1 (1.4) | 1 (1.9) | > 0.90 |
| CAA after 2 years; n (%) | 1 (1.4) | 0 (0.0) | > 0.90 |
|  |  |  |  |
| Fever duration from initial treatment to fever resolution; hour | 96 (72-107) | 72 (59-98) | 0.02 |
| Fever resolution within 24 hours of initiating second-line treatment; n (%) | 35 (50) | 38 (70) | 0.04 |
| Additional treatment; n (%) | 22 (31) | 18 (33) | > 0.90 |
| Plasma exchange; n (%) | 6 (9) | 8 (15) | 0.42 |

Data are expressed as the median (IQR) or n (%). IVIG: high-dose intravenous immunoglobulin. IFX: infliximab. HDL cholesterol: high-density lipoprotein cholesterol. LDL cholesterol: low-density lipoprotein cholesterol. CA: coronary artery. CAA: coronary artery abnormality. CAA defined maximum coronary artery Z-score >2.5.

* Brunner–Munzel or Chi-squared test
