# Supplementary material
Source: Research Square preprint supplement (doi:10.21203/rs.3.rs-8939070/v1)
Supplement: Supplementary file 2 [file 2599b653d15ca21b3d73ee01.docx]

**Table 4** Comparison of demographics, clinical features, and blood laboratory data among three subgroups identified by second clustering approach

| **Characteristics** | **Cluster 1 (n=64)** | **Cluster 2 (n=24)** | **Cluster 3 (n=36)** | **p value*** |
| --- | --- | --- | --- | --- |
| Age; months | 34 (26-46) | 34 (22-40) | 42 (29-55) | 0.11 |
| Male; n (%) | 36 (56) | 17 (71) | 17 (47) | 0.20 |
| Days of initial treatment; day | 5 (4-5) | 5 (4-6) | 5 (4-5) | 0.78 |
|  |  |  |  |  |
| 2nd line - second IVIG cases; n | 36 | 17 | 17 | 0.20 |
| resistant cases (additional treatment cases); n | 7 | 7 | 8 |  |
| resistant ratio; % | 19.4 | 41.2 | 47.1 |  |
| plasma exchange as an additional treatment; n | 3 | 0 | 3 |  |
| CAA after 30 days; n | 0 | 2 | 0 |  |
| CAA after 1 year; n | 0 | 1 | 0 |  |
|  |  |  |  |  |
| 2nd line - IFX cases; n | 28 | 7 | 19 | 0.20 |
| resistant cases (additional treatment cases); n | 12 | 0 | 6 |  |
| resistant ratio; % | 42.9 | 0.0 | 31.6 |  |
| plasma exchange as an additional treatment; n | 5 | 0 | 3 |  |
| CAA after 30 days; n | 2 | 0 | 0 |  |
| CAA after 1 year; n | 1 | 0 | 0 |  |
|  |  |  |  |  |
| White blood cell count (WBC); ×103 /µL | 14.6 (12.0-17.2) | 11.0 (9.4-13.5) | 14.0 (11.5-17.7) | < 0.01 |
| Hemoglobin; g/dL | 11.7 (11.2-12.1) | 11.0 (10.7-11.8) | 11.8 (11.1-12.8) | 0.01 |
| Platelet count; ×104 /µL | 32.1 (25.6-37.0) | 26.4 (21.6-34.6) | 25.6 (23.6-33.1) | 0.03 |
| Aspartate aminotransferase (AST); U/L | 43 (27-112) | 49 (30-72) | 70 (31-204) | 0.24 |
| Alanine aminotransferase (ALT); U/L | 27 (13-182) | 79 (14-148) | 122 (26-240) | 0.08 |
| Sodium; mmol/L | 133 (131-136) | 133 (129-135) | 131 (129-133) | < 0.01 |
| C-reactive protein (CRP); mg/L | 6.9 (5.0-10.4) | 7.4 (5.3-8.9) | 13.7 (12.5-16.2) | < 0.01 |
| Albumin; g/dL | 3.7 (3.4-3.8) | 3.2 (2.9-3.5) | 3.3 (3.0-3.8) | < 0.01 |
| Triglyceride; mg/dL | 91 (77-113) | 93 (76-132) | 89 (75-104) | 0.70 |
| Total cholesterol; mg/dL | 150 (140-167) | 109 (96-120) | 123 (117-133) | < 0.01 |
| HDL cholesterol; mg/dL | 39 (32-45) | 24 (17-28) | 31 (24-35) | < 0.01 |
| LDL cholesterol; mg/dL | 92 (81-108) | 66 (57-76) | 78 (69-102) | < 0.01 |
|  |  |  |  |  |
| Gunma score | 4 (2-6) | 5 (2-7) | 6 (5-8) | < 0.01 |

Data are expressed as the median (IQR) or n (%). IVIG: high-dose intravenous immunoglobulin. IFX: infliximab. CAA: coronary artery abnormality. CAA defined maximum coronary artery Z-score >2.5. HDL cholesterol: high-density lipoprotein cholesterol. LDL cholesterol: low-density lipoprotein cholesterol. * Kruskal-Wallis or Chi-squared test
