# Supplementary material
Source: Research Square preprint supplement (doi:10.21203/rs.3.rs-8939070/v1)
Supplement: Supplementary file 3 [file 279377866ed7b3eab15821b7.docx]

**Table 2** Comparison of demographics, clinical features, and blood laboratory data between responsive and resistant cases treated with second IVIG or IFX

| **Demographics**  **and blood laboratory data** | **2nd line – second IVIG group** | |  | **2nd line – IFX group** | |  |
| --- | --- | --- | --- | --- | --- | --- |
| **Responsive (n=48)** | **Resistant (n=22)** | **p value*** | **Responsive (n=36)** | **Resistant (n=18)** | **p value*** |
| Age; months | 33 (26-42) | 31 (27-44) | 0.62 | 39 (24-56) | 42 (34-65) | 0.28 |
| Male; n (%) | 25 (52) | 13 (59) | 0.77 | 21 (58) | 11 (61) | > 0.90 |
| Days of initial treatment; day | 5 (5-5) | 5 (4-5) | 0.09 | 5 (4-6) | 4 (4-5) | < 0.01 |
|  |  |  |  |  |  |  |
| White blood cell count (WBC); ×103 /µL | 13.3 (11.0-14.7) | 11.5 (8.7-18.1) | 0.50 | 14.7 (11.6-18.3) | 15.1(13.0-17.3) | 0.68 |
| Hemoglobin; g/dL | 11.6 (11.0-12.0) | 11.7 (11.0-12.1) | 0.69 | 11.9 (11.2-12.3) | 11.5 (10.8-12.1) | 0.34 |
| Platelet count; ×104 /µL | 29.2 (24.4-36.4) | 27.1 (21.7-35.1) | 0.27 | 31.2 (24.8-36.8) | 26.6 (24.3-32.7) | 0.18 |
| Aspartate aminotransferase (AST); U/L | 40 (28-105) | 63 (39-126) | 0.19 | 41 (28-62) | 167 (28-456) | 0.33 |
| Alanine aminotransferase (ALT); U/L | 38 (13-182) | 106 (34-243) | 0.19 | 25 (16-114) | 172 (17-452) | 0.21 |
| Sodium; mmol/L | 132 (130-135) | 130 (129-134) | 0.43 | 133 (131-135) | 132 (130-133) | 0.04 |
| C-reactive protein (CRP); mg/L | 6.9 (4.8-10.2) | 11.8 (9.0-13.7) | < 0.01 | 10.2 (6.9-13.6) | 10.2 (5.6-12.7) | 0.67 |
| Albumin; g/dL | 3.5 (3.1-3.8) | 3.3 (3.0-3.5) | 0.11 | 3.7 (3.3-3.9) | 3.7 (3.4-3.8) | > 0.90 |
| Triglyceride; mg/dL | 92 (78-112) | 96 (77-131) | 0.66 | 89 (73-135) | 81 (67-95) | 0.40 |
| Total cholesterol; mg/dL | 143 (126-154) | 121 (107-144) | 0.03 | 135 (116-161) | 131 (124-151) | 0.84 |
| HDL cholesterol; mg/dL | 33 (28.3-40) | 30 (23-36) | 0.16 | 31 (25-74) | 38 (33-49) | 0.03 |
| LDL cholesterol; mg/dL | 87 (77-100) | 71 (60-90) | 0.02 | 87 (67-109) | 81 (68-93) | 0.46 |
|  |  |  |  |  |  |  |
| Gunma score | 4 (2-6) | 6 (6-8) | < 0.01 | 4 (2-6) | 7 (5-9) | <0.01 |

Data are expressed as the median (IQR) or n (%). IVIG: high-dose intravenous immunoglobulin. IFX: infliximab. HDL cholesterol: high-density lipoprotein cholesterol. LDL cholesterol: low-density lipoprotein cholesterol. * Brunner–Munzel or Chi-squared test
