# Supplementary material
Source: Research Square preprint supplement (doi:10.21203/rs.3.rs-8939070/v1)
Supplement: Supplementary file 4 [file 543cfdc299bf884d3e80afd3.docx]

**Table 3** Comparison of demographics, clinical features, and blood laboratory data between two subgroups identified by initial clustering approach

| **Characteristics** | **Cluster I (n=71)** | **Cluster II (n=53)** | **p value*** |
| --- | --- | --- | --- |
| Age; months | 36 (27-53) | 34 (24-43) | 0.18 |
| Male; n (%) | 40 (56) | 30 (57) | > 0.90 |
| Days of initial treatment; day | 5 (4-5) | 5 (4-6) | 0.05 |
|  |  |  |  |
| 2nd line - second IVIG cases; n | 39 | 31 | 0.83 |
| resistant cases (additional treatment cases); n | 18 | 4 |  |
| resistant ratio; % | 46.1 | 12.9 |  |
| plasma exchange as an additional treatment; n | 4 | 2 |  |
| CAA after 30 days; n | 1 | 1 |  |
|  |  |  |  |
| 2nd line - IFX cases; n | 32 | 22 | 0.83 |
| resistant cases (additional treatment cases); n | 12 | 6 |  |
| resistant ratio; % | 37.5 | 27.3 |  |
| plasma exchange as an additional treatment; n | 5 | 3 |  |
| CAA after 30 days; n | 1 | 1 |  |
|  |  |  |  |
| White blood cell count (WBC); ×103 /µL | 13.6 (10.9-17.4) | 13.4 (11.0-15.3) | 0.53 |
| Hemoglobin; g/dL | 11.7 (11.1-12.4) | 11.3 (10.8-11.9) | 0.01 |
| Platelet count; ×104 /µL | 25.6 (21.9-31.8) | 35.2 (28.0-37.7) | < 0.01 |
| Aspartate aminotransferase (AST); U/L | 63 (39-184) | 33 (25-61) | < 0.01 |
| Alanine aminotransferase (ALT); U/L | 101 (25-244) | 17 (12-106) | < 0.01 |
| Creatine Kinase; U/L | 45 (27-63) | 50 (42-77) | 0.03 |
| Sodium; mmol/L | 131 (129-133) | 135 (132-136) | < 0.01 |
| C-reactive protein (CRP); mg/L | 11.2 (8.8-14.0) | 6.4 (4.2-8.5) | < 0.01 |
| Albumin; g/dL | 3.4 (3.0-3.8) | 3.6 (3.3-3.8) | 0.03 |
| Triglyceride; mg/dL | 100 (80-131) | 84 (72-97) | < 0.01 |
| Total cholesterol; mg/dL | 130 (118-156) | 141 (124-151) | 0.42 |
| HDL cholesterol; mg/dL | 32 (24-40) | 34 (29-41) | 0.11 |
| LDL cholesterol; mg/dL | 82 (67-104) | 86 (71-96) | 0.80 |
|  |  |  |  |
| Gunma score | 6 (5-8) | 3 (1-5) | < 0.01 |

Data are expressed as the median (IQR) or n (%). IVIG: high-dose intravenous immunoglobulin. IFX: infliximab. CAA: coronary artery abnormality. CAA defined maximum coronary artery Z-score >2.5. HDL cholesterol: high-density lipoprotein cholesterol. LDL cholesterol: low-density lipoprotein cholesterol.

* Brunner–Munzel or Chi-squared test
